# Supplementary material for: Development and Validation of a High-Performance Liquid Chromatography Method for Quality Assessment of Oriental Medicine, Dokhwalgisaeng-Tang
Source: MDPI journal article supplement (doi:10.3390/app11177829), 2021-08-25
Supplement: s1 [file s1]

# Supplementary Materials: Development and Validation of a High-Performance Liquid Chromatography Method for Quality Assessment of Oriental Medicine, Dokhwalgisaeng-Tang

Chang-Seob Seo and Hyeun-Kyoo Shin

**Table S1.** Information and composition of DHGST.

| Herbal medicine             | Scientific name                          | English name              | Family         | Used part            | Origin             | Amount (g) |
|-----------------------------|------------------------------------------|---------------------------|----------------|----------------------|--------------------|------------|
| Araliae Continentalis Radix | <i>Aralia continentalis</i> Kitag.       | Aralia Contineltalis Root | Araliaceae     | Root                 | Uiseong, Korea     | 411.95     |
| Angelicae Gigantis Radix    | <i>Angelica gigas</i> Nakai              | Angelica Gigas Root       | Apiaceae       | Root                 | Pyeongchang, Korea | 411.95     |
| Paeoniae Radix              | <i>Paeonia lactiflora</i> Pall.          | Peony Root                | Paeoniaceae    | Root                 | Uiseong, Korea     | 411.95     |
| Taxilli Herba               | <i>Taxillus chinensis</i> (DC.) Danser   | Chinese Taxillus Twig     | Loranthaceae   | Leaf, stem, and twig | China              | 411.95     |
| Rehmanniae Radix Preparata  | <i>Rehmannia glutinosa</i> (Gaertn.) DC. | Prepared Rehmannia Root   | Plantaginaceae | Root                 | Jeongeup, Korea    | 294.03     |
| Cnidii Rhizoma              | <i>Cnidium officinale</i> Mak.           | Cnidium Rhizome           | Umbelliferae   | Rhizome              | Yeongyang, Korea   | 294.03     |
| Ginseng Radix               | <i>Panax ginseng</i> C.A.Mey.            | Ginseng                   | Araliaceae     | Root                 | Geumsan, Korea     | 294.03     |
| Poria Sclerotium            | <i>Poria cocos</i> Wolf                  | Poria                     | Polyporaceae   | Sclerotium           | Bonghwa, Korea     | 294.03     |
| Achyranthis Radix           | <i>Achyranthes bidentata</i> Blume       | Achyranthes Root          | Amaranthaceae  | Root                 | Hwasun, Korea      | 294.03     |
| Eucommiae Cortex            | <i>Eucommia ulmoides</i> Oliv.           | Eucommia Bark             | Eucommiaceae   | Bark                 | Samcheok, Korea    | 294.03     |

|                                  |                                                       |                               |                  |                     |               |         |
|----------------------------------|-------------------------------------------------------|-------------------------------|------------------|---------------------|---------------|---------|
| Gentianae<br>Macrophyllae Radix  | <i>Gentiana straminea</i> Maxim.                      | Gentiana Macrophylla<br>Root  | Gentianaceae     | Root                | China         | 294.03  |
| Asiasari Radix et<br>Rhizoma     | <i>Asarum heterotropoides</i> F.<br>Schmidt           | Asiasarum Root and<br>Rhizoma | Aristolochiaceae | Root and<br>rhizome | China         | 294.03  |
| Saposhnikoviae<br>Radix          | <i>Saposhnikovia divaricate</i><br>(Turcz.) Schischk. | Saposhnikovia Root            | Apiaceae         | Root                | China         | 294.03  |
| Cinnamomi Cortex                 | <i>Cinnamomum cassia</i> (L.) J.Presl                 | Cinnamom Bark                 | Lauraceae        | Bark                | Veitanam      | 294.03  |
| Glycyrrhizae Radix<br>et Rhizoma | <i>Glycyrrhiza uralensis</i> Fisch.                   | Licorice                      | Leguminosae      | Root and<br>rhizome | China         | 176.10  |
| Zingiberis Rhizoma<br>Recens     | <i>Zingiber officinale</i> Roscoe                     | Raw Ginger                    | Zingiberaceae    | Rhizome             | Seosan, Korea | 235.80  |
| Total (g)                        |                                                       |                               |                  |                     |               | 5000.00 |

**Table S2.** HPLC operating conditions for simultaneous quantification of the 24 marker components in DHGST.

| <b>Parameter for HPLC analysis</b> |                                                                                                               |       |       |
|------------------------------------|---------------------------------------------------------------------------------------------------------------|-------|-------|
| HPLC system                        | Prominence LC-20A series (Shimadzu, Kyoto, Japan)                                                             |       |       |
| Detector                           | Photo-diode array detector                                                                                    |       |       |
| Detection wavelength (nm)          | 230, 240, 250, 270, 275, 280, 290, 300, 320, 325, 330 and 335                                                 |       |       |
| Column                             | C18-reverse phase analytical column (SunFire C18, 4.6 × 250 mm, particle size 5 µm, Waters, Milford, MA, USA) |       |       |
| Column oven Temperature (°C)       | 40.0                                                                                                          |       |       |
| Flow rate (mL/min)                 | 1.0                                                                                                           |       |       |
| Injection volume (µL)              | 10.0                                                                                                          |       |       |
| Mobile phase                       | A: 0.1% (v/v) formic acid in distilled water                                                                  |       |       |
|                                    | B: 0.1% (v/v) formic acid in acetonitrile                                                                     |       |       |
| Gradient elution                   | Time (min)                                                                                                    | A (%) | B (%) |
|                                    | 0                                                                                                             | 95    | 5     |
|                                    | 50                                                                                                            | 40    | 60    |
|                                    | 60                                                                                                            | 0     | 100   |
|                                    | 70                                                                                                            | 0     | 100   |
|                                    | 80                                                                                                            | 95    | 5     |
|                                    | 90                                                                                                            | 95    | 5     |

**Table S3.** System suitability for the analysis of the 24 marker compounds with the developed HPLC method.

| Compound | $k'$  | $\alpha$ | $N$      | $R_s$ | $T_f$ |
|----------|-------|----------|----------|-------|-------|
| 1        | 1.15  | 1.75     | 16,865   | 8.57  | 1.02  |
| 2        | 2.02  | 1.13     | 52,309   | 3.12  | 1.03  |
| 3        | 2.27  | 1.13     | 89,543   | 3.12  | 0.99  |
| 4        | 3.26  | 1.27     | 310,553  | 15.12 | 1.08  |
| 5        | 4.14  | 1.15     | 289,522  | 10.28 | 1.13  |
| 6        | 4.77  | 1.06     | 434,085  | 4.84  | 1.07  |
| 7        | 5.05  | 1.03     | 562,145  | 2.51  | 0.92  |
| 8        | 5.20  | 1.03     | 429,662  | 2.51  | 1.06  |
| 9        | 5.51  | 1.01     | 695,111  | 1.27  | 1.01  |
| 10       | 5.58  | 1.01     | 553,186  | 1.27  | 1.20  |
| 11       | 6.26  | 1.02     | 455,146  | 1.94  | 1.17  |
| 12       | 6.40  | 1.02     | 549,249  | 1.94  | 1.08  |
| 13       | 6.65  | 1.03     | 522,658  | 2.54  | 1.06  |
| 14       | 6.82  | 1.03     | 796,159  | 2.54  | 1.07  |
| 15       | 7.11  | 1.04     | 968,090  | 5.05  | 1.07  |
| 16       | 7.91  | 1.11     | 468,111  | 11.02 | 1.03  |
| 17       | 8.88  | 1.12     | 443,229  | 10.31 | 1.03  |
| 18       | 10.38 | 1.11     | 796,587  | 11.47 | 1.03  |
| 19       | 11.52 | 1.11     | 582,629  | 11.47 | 1.03  |
| 20       | 13.88 | 1.13     | 1418,878 | 18.17 | 1.12  |
| 21       | 15.64 | 1.13     | 1074,775 | 18.17 | 1.02  |
| 22       | 17.47 | 1.04     | 1203,884 | 7.25  | 1.03  |
| 23       | 18.23 | 1.01     | 1894,128 | 1.66  | 1.02  |
| 24       | 18.38 | 1.01     | 2158,966 | 1.66  | 1.03  |

$k'$ ; capacity factor,  $\alpha$ ; relative retention,  $N$ ; theoretical plate number,  $R_s$ ; resolution, and  $T_f$ ; tailing factor

**Table S4.** Repeatability of retention time of the 24 marker analytes using HPLC ( $n = 6$ ).

| Analyte | No., Retention time (min) |        |        |        |        |        | Mean  | SD ( $\times 10^{-1}$ ) | RSD (%) |
|---------|---------------------------|--------|--------|--------|--------|--------|-------|-------------------------|---------|
|         | 1                         | 2      | 3      | 4      | 5      | 6      |       |                         |         |
| 1       | 6.224                     | 6.216  | 6.23   | 6.229  | 6.229  | 6.226  | 6.23  | 0.05                    | 0.08    |
| 2       | 8.717                     | 8.711  | 8.723  | 8.811  | 8.717  | 8.718  | 8.73  | 0.38                    | 0.44    |
| 3       | 9.438                     | 9.442  | 9.44   | 9.45   | 9.447  | 9.44   | 9.44  | 0.05                    | 0.05    |
| 4       | 12.262                    | 12.262 | 12.263 | 12.272 | 12.272 | 12.263 | 12.27 | 0.05                    | 0.04    |
| 5       | 14.807                    | 14.799 | 14.81  | 14.723 | 14.804 | 14.799 | 14.79 | 0.33                    | 0.22    |
| 6       | 16.63                     | 16.632 | 16.631 | 16.641 | 16.641 | 16.629 | 16.63 | 0.06                    | 0.03    |
| 7       | 17.429                    | 17.422 | 17.438 | 17.405 | 17.425 | 17.42  | 17.42 | 0.11                    | 0.06    |
| 8       | 17.869                    | 17.869 | 17.856 | 17.864 | 17.86  | 17.86  | 17.86 | 0.05                    | 0.03    |
| 9       | 18.754                    | 18.748 | 18.764 | 18.731 | 18.751 | 18.744 | 18.75 | 0.11                    | 0.06    |
| 10      | 18.956                    | 18.96  | 18.958 | 18.964 | 18.96  | 18.959 | 18.96 | 0.03                    | 0.01    |
| 11      | 20.907                    | 20.912 | 20.909 | 20.914 | 20.911 | 20.909 | 20.91 | 0.03                    | 0.01    |
| 12      | 21.301                    | 21.291 | 21.302 | 21.277 | 21.294 | 21.291 | 21.29 | 0.09                    | 0.04    |
| 13      | 22.047                    | 22.037 | 22.048 | 22.02  | 22.04  | 22.038 | 22.04 | 0.10                    | 0.05    |
| 14      | 22.528                    | 22.517 | 22.527 | 22.511 | 22.52  | 22.518 | 22.52 | 0.06                    | 0.03    |
| 15      | 23.364                    | 23.353 | 23.365 | 23.353 | 23.357 | 23.355 | 23.36 | 0.05                    | 0.02    |
| 16      | 25.643                    | 25.632 | 25.646 | 25.632 | 25.636 | 25.632 | 25.64 | 0.06                    | 0.02    |
| 17      | 28.454                    | 28.442 | 28.456 | 28.441 | 28.446 | 28.446 | 28.45 | 0.06                    | 0.02    |
| 18      | 32.786                    | 32.776 | 32.791 | 32.78  | 32.78  | 32.779 | 32.78 | 0.05                    | 0.02    |
| 19      | 36.04                     | 36.05  | 36.041 | 36.048 | 36.05  | 36.04  | 36.04 | 0.05                    | 0.01    |
| 20      | 42.781                    | 42.789 | 42.783 | 42.791 | 42.789 | 42.782 | 42.79 | 0.04                    | 0.01    |
| 21      | 47.933                    | 47.922 | 47.939 | 47.931 | 47.928 | 47.93  | 47.93 | 0.06                    | 0.01    |
| 22      | 53.207                    | 53.195 | 53.21  | 53.207 | 53.2   | 53.205 | 53.20 | 0.06                    | 0.01    |
| 23      | 55.387                    | 55.374 | 55.389 | 55.384 | 55.379 | 55.383 | 55.38 | 0.05                    | 0.01    |
| 24      | 55.826                    | 55.814 | 55.828 | 55.823 | 55.818 | 55.822 | 55.82 | 0.05                    | 0.01    |

**Table S5.** Repeatability of peak area of the 24 marker analytes using HPLC ( $n = 6$ ).

| Analyte | No., Peak area |         |         |         |         |         | Mean      | SD      | RSD (%) |
|---------|----------------|---------|---------|---------|---------|---------|-----------|---------|---------|
|         | 1              | 2       | 3       | 4       | 5       | 6       |           |         |         |
| 1       | 354,169        | 352,767 | 353,547 | 352,289 | 352,289 | 352,301 | 352893.67 | 793.96  | 0.22    |
| 2       | 580,179        | 579,153 | 582,550 | 579,154 | 581,123 | 581,578 | 580622.83 | 1370.50 | 0.24    |
| 3       | 46,461         | 46,104  | 46,327  | 47,142  | 46,994  | 46,813  | 46640.17  | 406.09  | 0.87    |
| 4       | 36,758         | 36,815  | 36,656  | 36,913  | 36,848  | 36,880  | 36811.67  | 93.15   | 0.25    |
| 5       | 329,246        | 329,268 | 322,372 | 329,605 | 330,138 | 324,713 | 327557.00 | 3212.75 | 0.98    |
| 6       | 139,714        | 140,166 | 139,704 | 142,816 | 141,529 | 140,848 | 140796.17 | 1214.95 | 0.86    |
| 7       | 59,291         | 58,996  | 59,070  | 58,673  | 58,262  | 58,201  | 58748.83  | 447.45  | 0.76    |
| 8       | 41,938         | 40,029  | 40,292  | 40,145  | 41,114  | 40,679  | 40699.50  | 725.15  | 1.78    |
| 9       | 73,910         | 72,959  | 74,385  | 72,788  | 72,952  | 73,104  | 73349.67  | 643.81  | 0.88    |
| 10      | 70,321         | 70,752  | 70,519  | 71,883  | 72,153  | 71,751  | 71229.83  | 788.68  | 1.11    |
| 11      | 19,900         | 20,095  | 19,970  | 20,312  | 20,359  | 20,401  | 20172.83  | 213.41  | 1.06    |
| 12      | 69,522         | 69,185  | 67,896  | 69,273  | 68,112  | 68,121  | 68684.83  | 716.28  | 1.04    |
| 13      | 181,259        | 181,380 | 184,363 | 182,171 | 182,270 | 182,476 | 182319.83 | 1116.44 | 0.61    |
| 14      | 357,121        | 357,250 | 358,619 | 357,336 | 357,971 | 359,389 | 357947.67 | 902.54  | 0.25    |
| 15      | 65,827         | 65,664  | 66,071  | 65,282  | 66,461  | 65,769  | 65845.67  | 396.58  | 0.60    |
| 16      | 346,095        | 344,968 | 348,188 | 344,639 | 346,584 | 345,582 | 346009.33 | 1282.89 | 0.37    |
| 17      | 260,167        | 259,558 | 262,379 | 261,236 | 261,402 | 259,076 | 260636.33 | 1249.04 | 0.48    |
| 18      | 68,565         | 68,212  | 68,720  | 68,417  | 68,510  | 68,802  | 68537.67  | 212.25  | 0.31    |
| 19      | 219,589        | 219,557 | 217,711 | 223,231 | 221,175 | 222,474 | 220622.83 | 2059.99 | 0.93    |
| 20      | 22,388         | 22,240  | 22,254  | 22,258  | 22,633  | 22,703  | 22412.67  | 206.09  | 0.92    |
| 21      | 20,090         | 20,041  | 20,158  | 20,157  | 20,160  | 20,441  | 20174.50  | 139.12  | 0.69    |
| 22      | 11,674         | 11,665  | 11,897  | 11,866  | 11,741  | 11,867  | 11785.00  | 104.39  | 0.89    |
| 23      | 12,6738        | 126,477 | 126,976 | 127,592 | 127,576 | 127,581 | 127156.67 | 493.01  | 0.39    |
| 24      | 81,813         | 81,843  | 82,148  | 82,627  | 82,515  | 82,452  | 82233.00  | 351.69  | 0.43    |

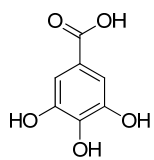

Gallic acid (1)

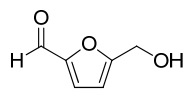

5-Hydroxymethylfurfural (2)

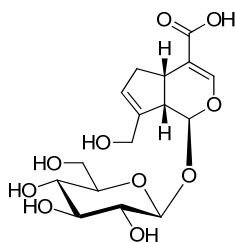

Geniposidic acid (3)

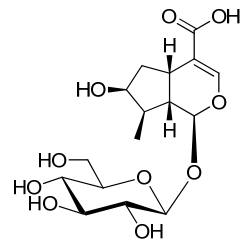

Loganic acid (4)

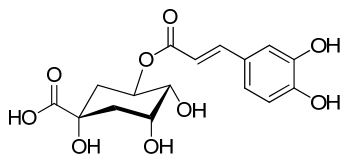

Chlorogenic acid (5)

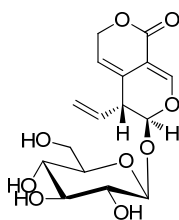

Gentiopicroside (6)

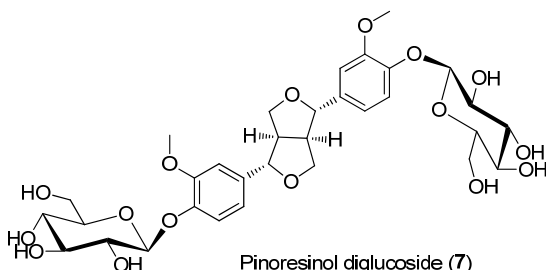

Pinoresinol diglucoside (7)

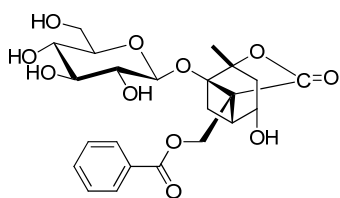

Albiflorin (8)

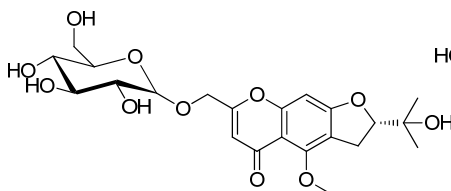

*prim*-O-Glucosylcimifugin (9)

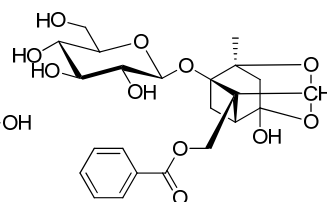

Paeoniflorin (10)

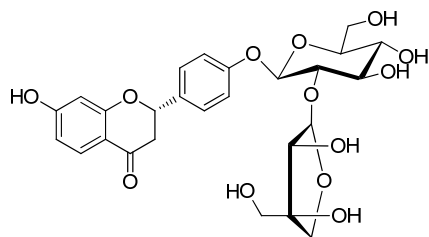

Liquiritin apioside (11)

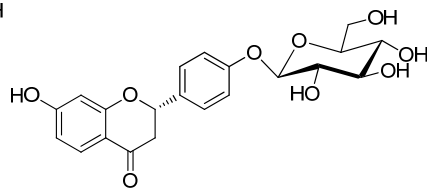

Liquiritin (12)

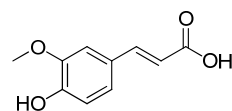

Ferulic acid (13)

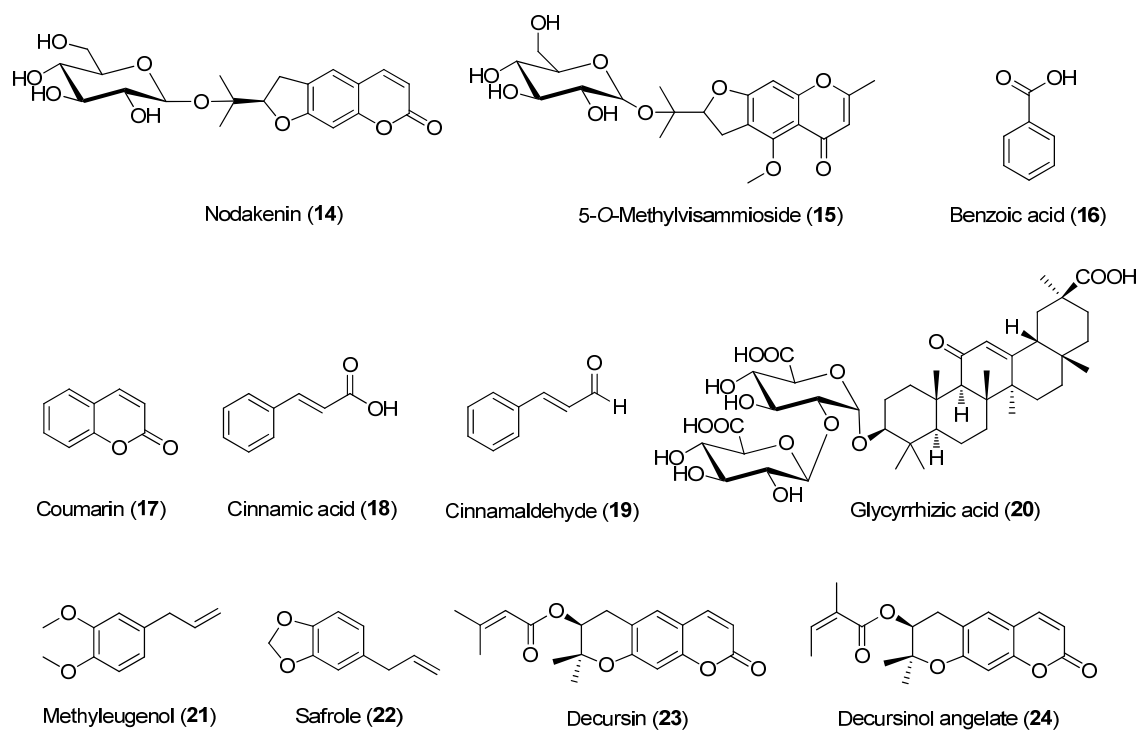

**Figure S1.** Chemical structures of the 24 marker components in DHGST.



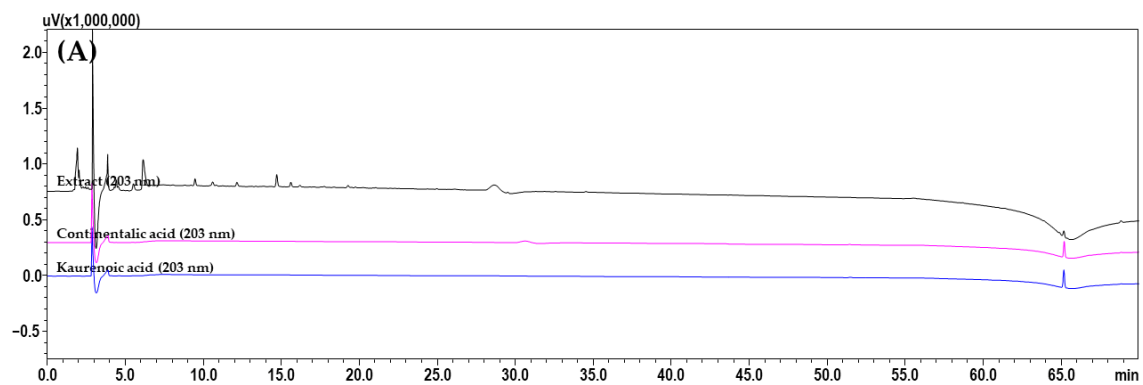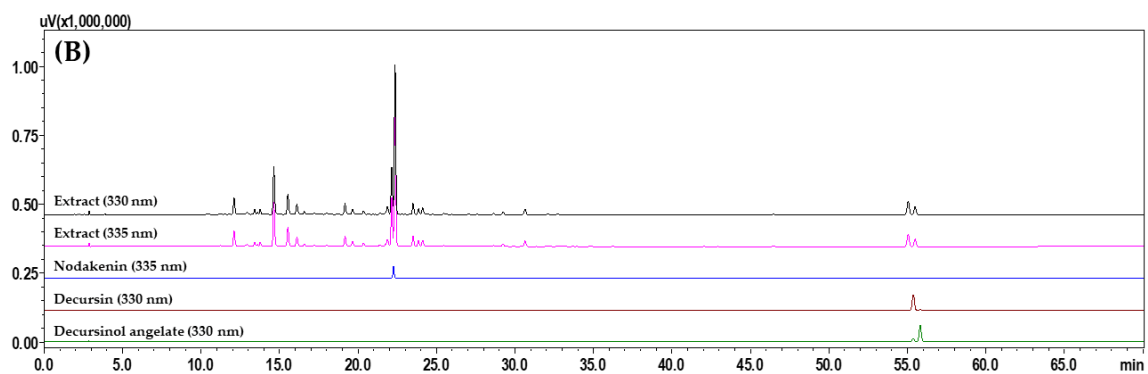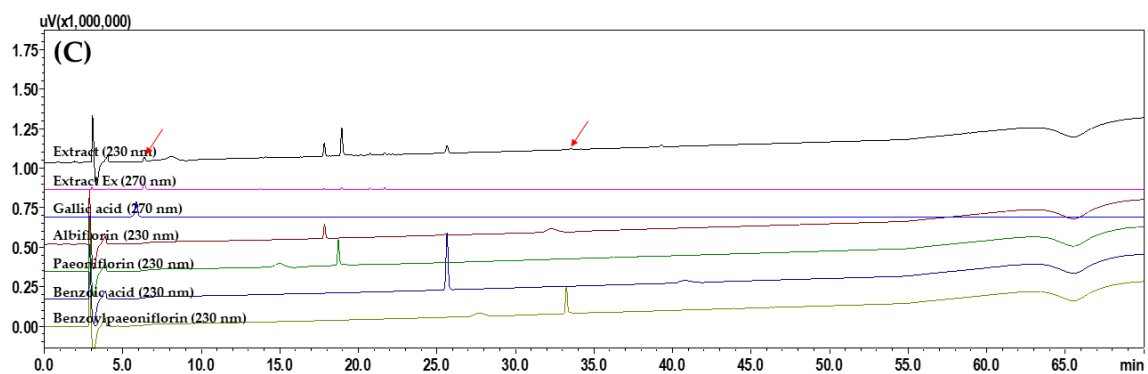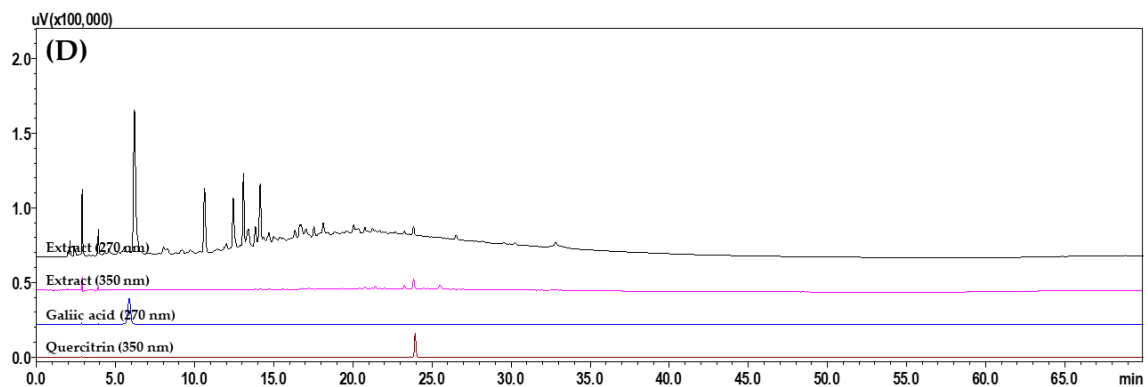

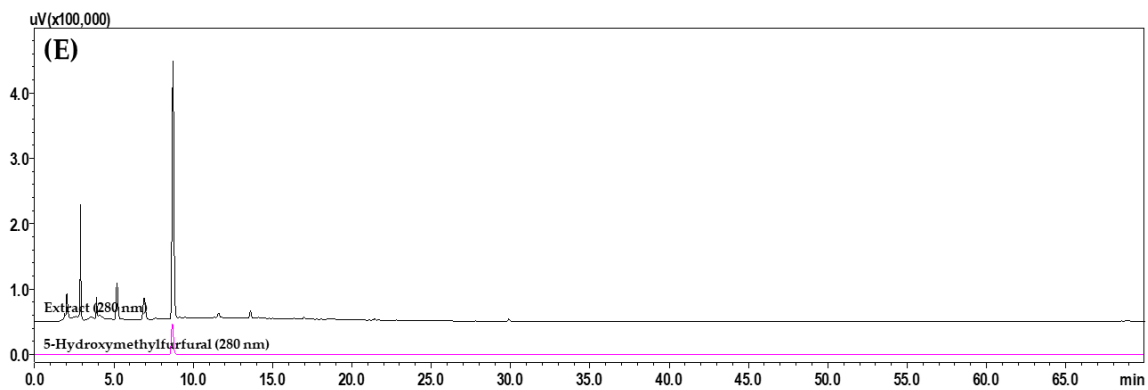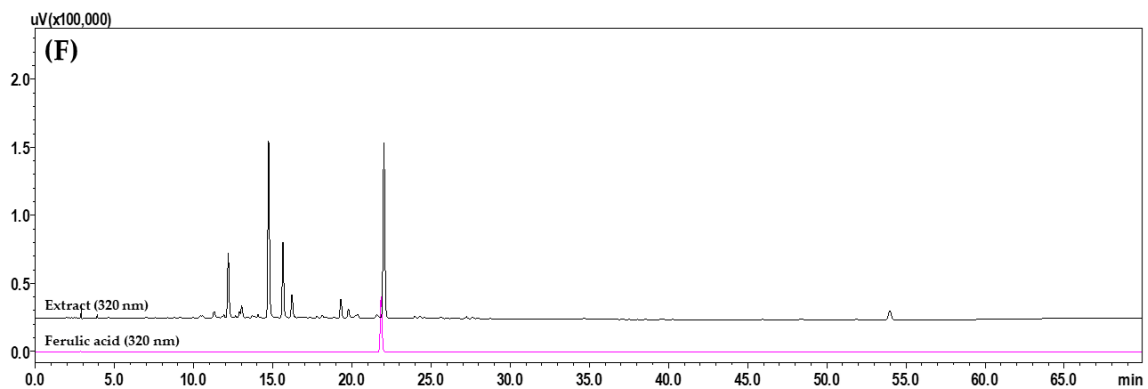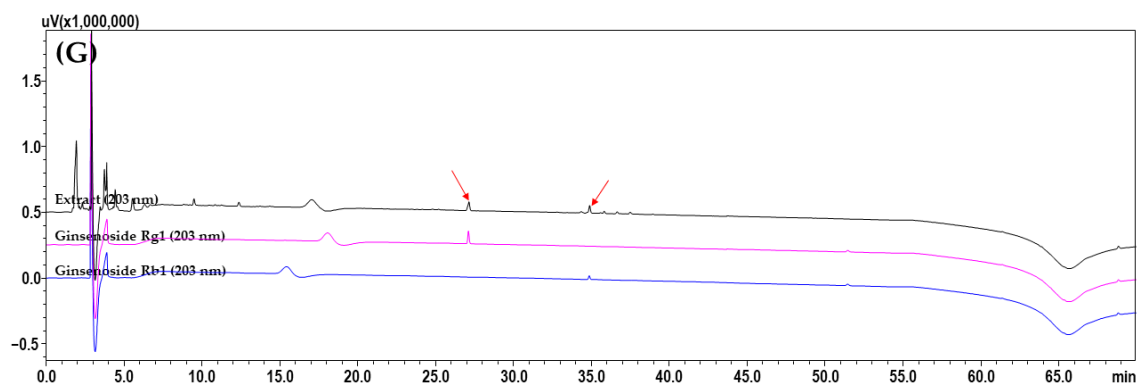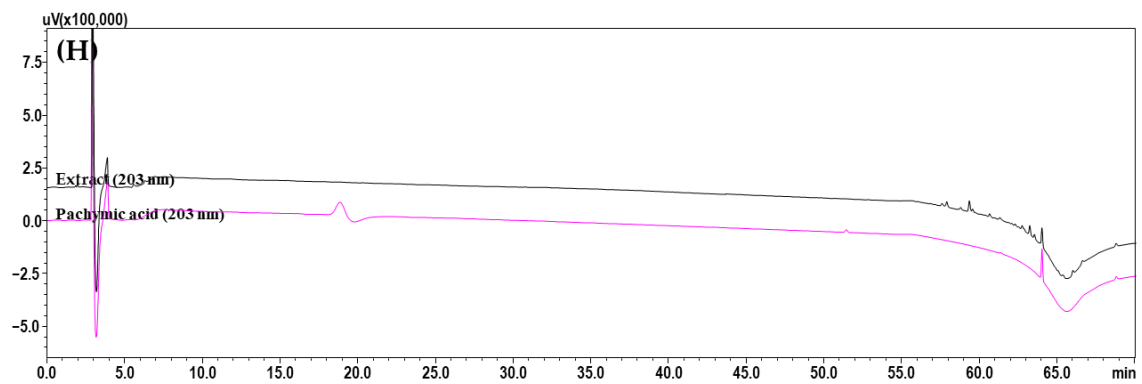

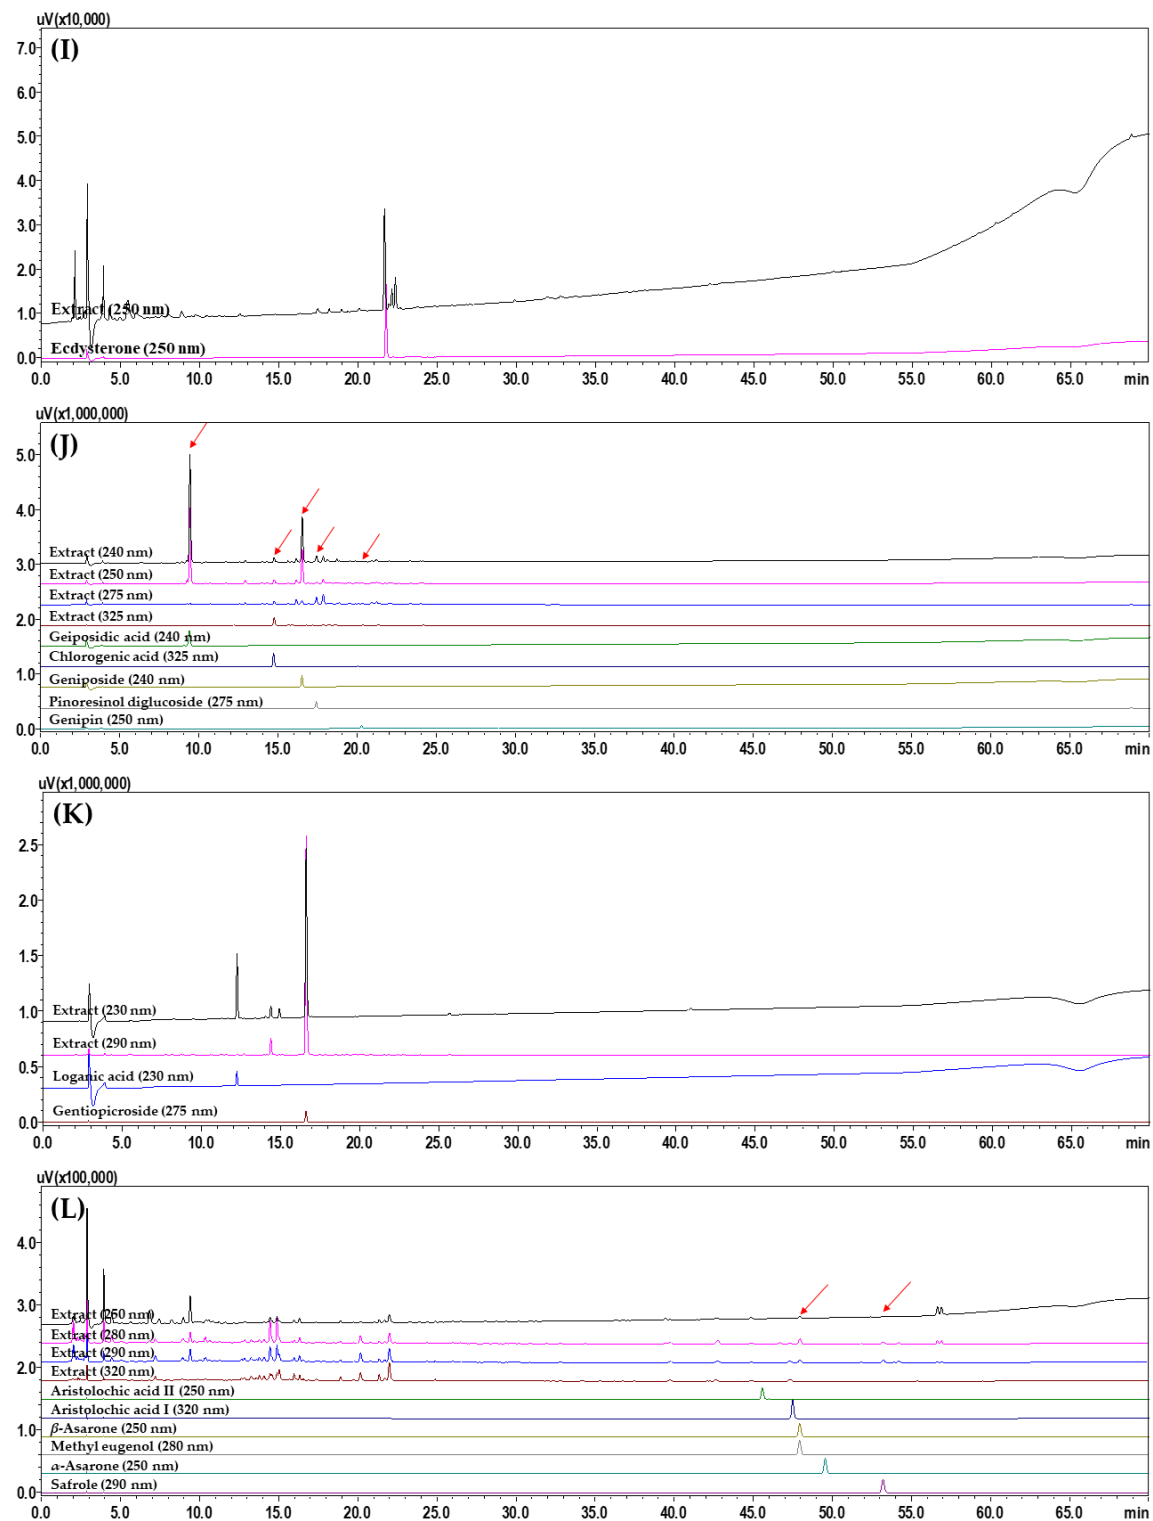

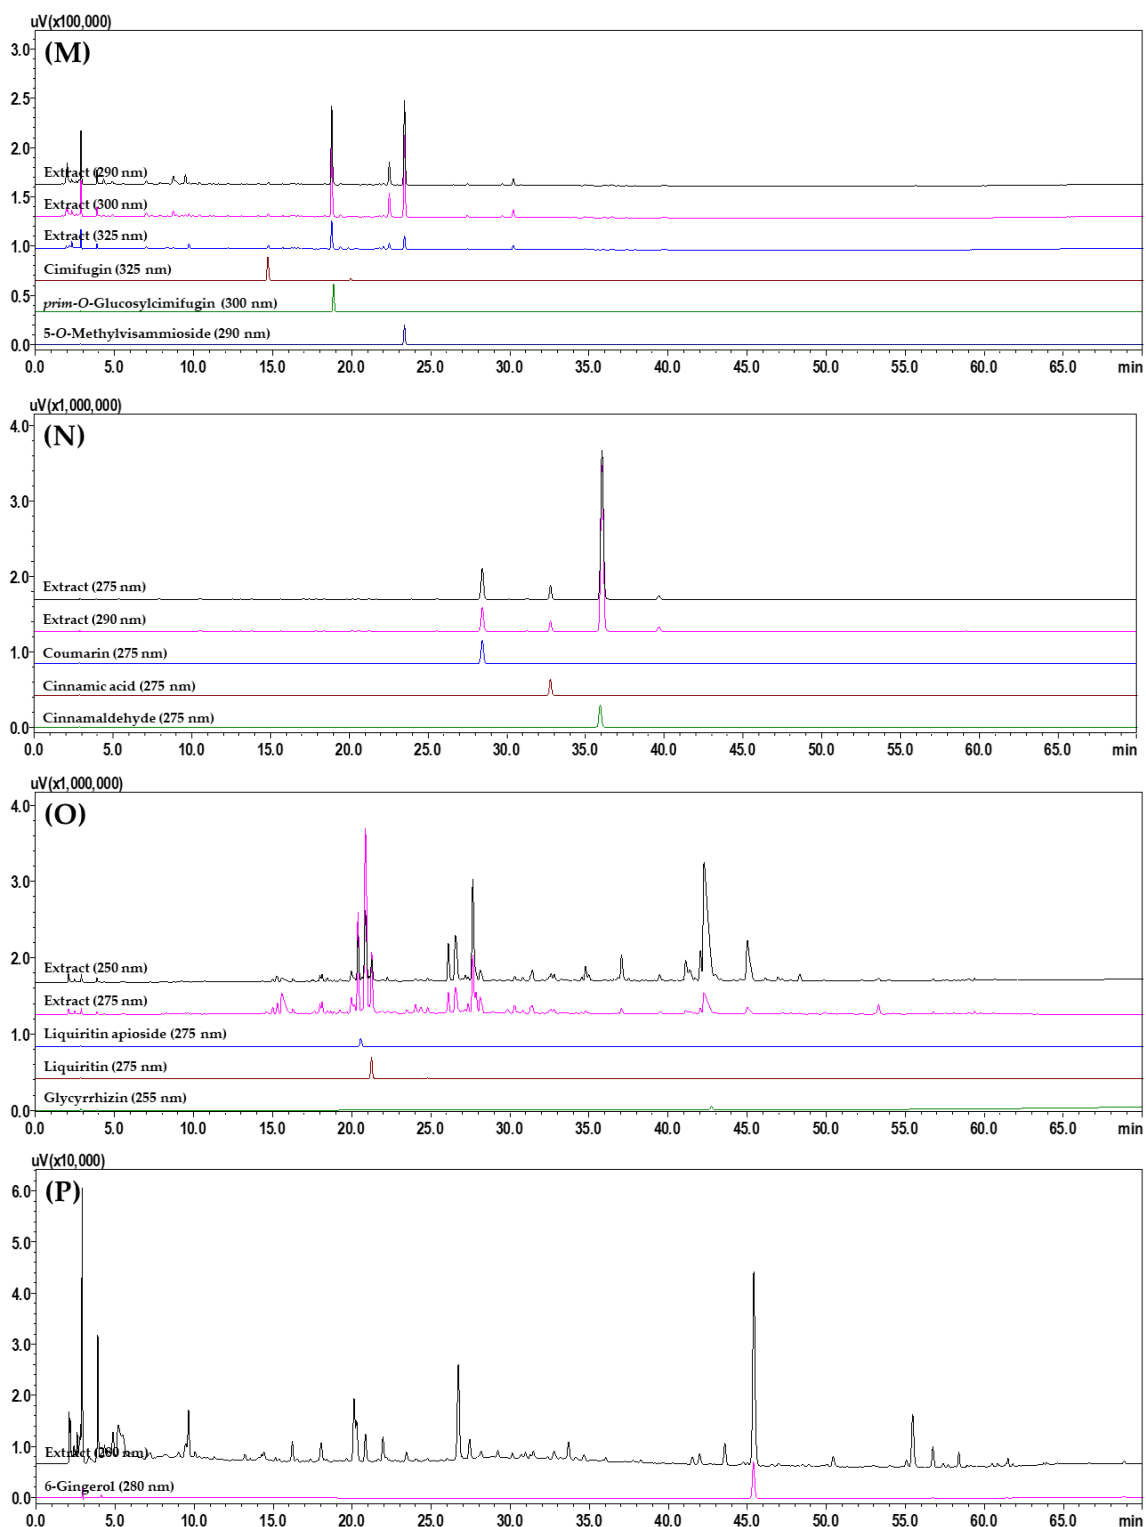

**Figure S2.** HPLC chromatogram of herbal medicine extract and its main components. A: *A. continentalis*; B: *A. gigas*; C: *P. lactiflora*; D: *T. chinensis*; E: *R. glutinosa*; F: *C. officinale*; G: *P. ginseng*; H: *P. cocos*; I: *A.*

*bidentata*; J, *E. ulmoides*; K, *G. straminea*; L, *A. heterotropoides*; M, *S. divaricate*; N, *C. cassia*; O, *G. uralensis*; and P, *Z. officinale*.

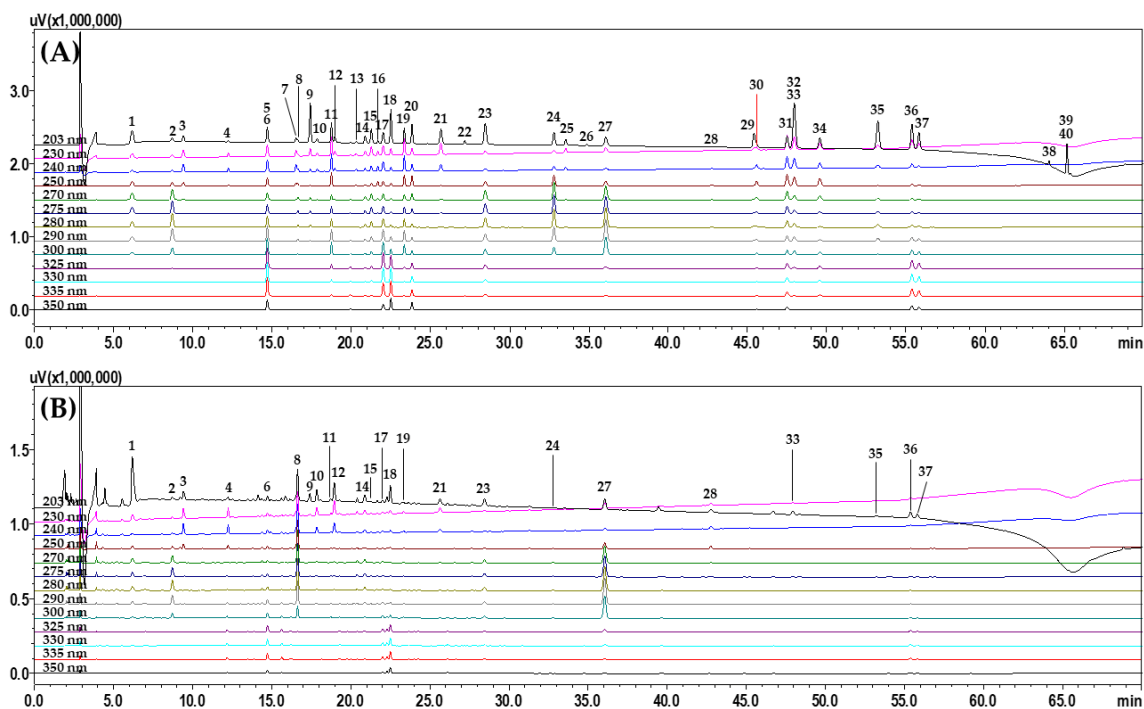

**Figure S3.** HPLC chromatograms of the standard solution (A) and 70% MeOH extract of DHGST sample (B). Gallic acid (1), 5-hydroxymethylfurfural (2), geniposidic acid (3), loganic acid (4), cimufugin (5), chlorogenic acid (6), geniposide (7), gentiopicroside (8), pinorelinol diglucoside (9), albiflorin (10), *prim-O*-glucosylcimufugin (11), paeoniflorin (12), genipin (13), liquiritin apioside (14), liquiritin (15), ecdysterone (16), ferulic acid (17), nodakenin (18), 5-*O*-methylvisammioside (19), quercitrin (20), benzoic acid (21), ginsenoside Rg1 (22), coumarin (23), cinnamic acid (24), benzoylpaeoniflorin (25), ginsenoside Rb1 (26), cinnamaldehyde (27), glycyrrhizin (28), 6-gingerol (29), aristolochic acid II (30), aristolochic acid I (31),  $\beta$ -asarone (32), methyleugenol (33),  $\alpha$ -asarone (34), safrole (35), decursin (36), decursinol angelate (37), pachymic acid (38), continentalic acid (39), and kaurenoic acid (40).
